# Supplementary material
Source: publisher site journal article supplement (https://www.dovepress.com/article/269940)

**Supporting file _Section 1. Appendixes Three: Information sheet, Consent and Questionnaire for Research (In-depth-interview for the service provider)**

**Information Sheet and Consent to Participate in Research**

Date:---------------------------------

How are you? My name is ----------------------------- I provide the information about the researcher Mr. Mengistu Meskele Koyira, a Ph.D student at University of KwaZulu -Natal, and former staff of Wolaita Sodo University, his contact address is (+251913177996 or E-mail address: mengistu77@gmail.com). You are being invited to consider participating in a study that involves research in **“Intimate Partner Violence Against Women living with and without HIV: Contexts and associated factors in Wolaita Zone, Ethiopia”**. The aim and purpose of this research are to learn about women’s health and life experiences and to generate local evidence. The study is expected to enrol up to 25 interviews, but it depends on the information we get. We will conduct similar other interviews in the nine health facilities in Wolaita Zone. It will involve the following procedures. We are going to interview you, record the audio and take notes. The duration of your participation, if you choose to enroll and remain in the study, is expected to be 45 minutes.

The study may involve the following risks and/or discomforts. By participating in this research project, you may have minimum discomfort to disclose your painful experience, though, many women have found it helpful to have the opportunity to talk. we will also refer to psychological intervention or counselling service at health care facility in case you get discomfort. We (the research assistant) will also provide counselling at end of the interview. The study helps to generate local evidence to assist with the initiation and implementation of programs to address intimate partner violence against women.

This study has been ethically reviewed and approved by the UKZN Biomedical research Ethics Committee (approval number----------------------------------).

In the event of any problems or concerns/questions you may contact the researcher Mr.Mengistu Meskele (at +251913177996 or E-mail address: mengistu77@gmail.com) or the UKZN Biomedical Research Ethics Committee, contact details as follows:

**Biomedical Research Ethics Administration**

1. Research Office, Westville Campus
2. Govan Mbeki Building

Private Bag X 54001
Durban
4000

KwaZulu-Natal, SOUTH AFRICA

Tel: 27 31 2604769 - Fax: 27 31 2604609

Email: [BREC@ukzn.ac.za](mailto:ngwenyap@ukzn.ac.za)

Your participation in this research is completely voluntary. Your experiences could be very helpful to other women in Ethiopia. You may withdraw participation at any point, and that in the event of refusal/withdrawal of participation, the participants will not incur penalty or loss of treatment or other benefit to which they are normally entitled.

There is no direct benefit to your participation, but many women have found it helpful to have the opportunity to talk.

I kindly let you know that all of the answers you provide me will be kept secret. The researcher will not keep the record of your name or address. We will record the audios, but all will have kept secret, and your names will no longer be mentioned at any documents. Any information from the participants like raw data will be stored securely and kept confidential. The publications that will arise from this study will exclude any information that will make it possible to identify the participants’ name or identity. In case others enter the room, dummy questionnaires will be used.

**Consent**

I (-----------------------------------) have been informed about the study entitled (**Intimate Partner Violence Against Women living with and without HIV: Contexts and associated factors in Wolaita Zone, Ethiopia**) by (Mr.Mengistu Meskele Koyira).

I understand the purpose and procedures of the study.

I have been given an opportunity to answer questions about the study and have had answers to my satisfaction.

I declare that my participation in this study is entirely voluntary and that I may withdraw at any time without affecting any treatment or care that I would usually be entitled to.

I have been informed about any available compensation or medical treatment if an injury occurs to me as a result of study-related procedures.

If I have any further questions/concerns or queries related to the study I understand that I may contact the researcher at (Mr.Mengistu Meskele (+251913177996 or E-mail address: mengistu77@gmail.com)

If I have any questions or concerns about my rights as a study participant, or if I am concerned about an aspect of the study or the researchers, then I may contact:

**Biomedical Research Ethics Administration**

1. Research Office, Westville Campus
2. Govan Mbeki Building

Private Bag X 54001
 Durban
 4000

KwaZulu-Natal, SOUTH AFRICA

Tel: 27 31 2604769 - Fax: 27 31 2604609

Email: [BREC@ukzn.ac.za](mailto:ngwenyap@ukzn.ac.za)

Agree to audio recording Yes ------------ No-------------

Signature of Participant Date

____________________ _____________________

Witness name

1.----------------------------------- --------------------------------------

2.----------------------------------- --------------------------------------

Interviewer name

------------------------------------ ------------------------------------

Questionnaire: Semi-structured In-depth-interview questioner for service provider

1. What are your role or responsibility in this facility?
2. What are the most frequent reasons women give for coming to the office/ emergency room?
3. Are cases of family or intimate partner violence seen? What are the most common types of abuse that you identify? Do you think it is good to screen for violence?
4. Do you your staff members routinely ask questions to determine whether the patient might be a victim of family violence? Why? How? What instrument do you use? How often?
5. What tests or examinations do you routinely perform when a woman indicates that she has been the victim of violence? How do you decide which tests to perform?

6. What are the challenges for screening for abuse?

7. Were you trained to screen for abuse? How do you recognize that they are abused?

8. What types of abuse do you detect?

9. Do women disclose, without being asked, the abuse they experienced?

10. What form of education would you need regarding violence against women? How do you handle them? Do you detect them on your own or women report them to you?

11. What is the procedure for obtaining an official report from the medical examiner?

12.How many people with this type of problem does your institution serve per month? Do you have a way of keeping records on cases? Is there a form and procedure for recording them? Can you explain it to me?

(Request a copy of the record form, referral slips, and any other documents that may exist.)

13. Do you or your staff provide follow-up care to women who have been victims of family violence? Are there mechanisms for referring them to other institutions? Do you think the record-keeping system is adequate to identify women affected by family violence, refer them to the appropriate services, and provide timely follow-up services?

**Experience with women who are affected by Intimate Partner Violence**

14. Have you ever come into contact with cases of family violence among your clients?Can you tell me how these experiences originated, what you did, and what the client did?

**15.** Do you know of other organizations or persons in this community that work on family violence issues? Who are they? What is your relationship with them? Is there coordination with other institutions to address the needs of abused women?

1. What changes in legislation, policy, or staffing would facilitate your work?
2. What changes in the behaviours or attitudes of the person with whom you work would facilitate your work?
3. Do you think the partner violence can interfere with the treatment and care of ART drugs?

How?

1. Do you encourage women to disclose their HIV test results to their partners? Do they

disclose? After how long? With what results? Do you think their partners know their results? (do you think they know their partner’s results?

1. How do you think a husband/partner might react after women tell him her status (that you are HIV positive)?

Thank you!

| **Supporting File _Section2. Themes, categories and codes emerging from the study, November–December 2018** | | |
| --- | --- | --- |
| Emergent themes | Sub-themes/Categories /Meaning | Statements/Codes |
| 1. Types of IPV observed by the HCWs in victims of IPV on their first visit to a health facility | Physical assault  Sexual assault  Psychological/  emotional assault | Some presented at the hospital with a broken arm  Some victims presented at the hospital with visible swelling bodies  Some presented with body injuries  HCWs observed the signs of a stab wound on a woman with a knife in the body  Some victims presented with bruises  Some reported head injuries,  Some victims arrived with bleeding, or were unconsciousness because of physical assault/trauma  The HCWs observed/heard reports from their clients of the death of children during a fight between partners  Some reported that their hair follicles were removed during a fight  The intimate partners raped some victims  Women reported that their partner forced them to have unwanted sex  Some victims were crying  Others did not respond to any questions asked by the health providers  Some reported fear and family conflict  HCWs identified anxiety due to the social challenge the victims were encountering  Some reported a stigma or violent pressure from their partners |
| 2. Provider related barriers | Lack of in-service training  Difficulty in providing a medico-legal report | No training is given on GBV to HCWs; challenges of follow-up; no separate record-keeping for IPV; no routine assessment of violence; a gap in providing a medico-legal report on time; mistreatment of clients; HCWs provided counselling  HCWs have to consult senior staff |
| 3. Health care system barriers | Poor record-keeping  Lack of psychological counselling services  Lack of referral system  Shortage of medical equipment  Inadequate guidelines for management of IPV victims; No follow-up | No adequate record-keeping system;  no coordination with an external organization; no training facility; no referral system; lack of medico-legal equipment like ultrasound and x-ray; no separate registration |
| 4. Patient-level barriers | Disclosure of HIV results  Inequality of power between women and men  Women’s mindset that a man has the natural right to abuse women | Male dominance; male partners’ alcohol consumption leads to IPV; family conflict; discordant result of HIV; disagreement among couples; hiding disclosure of HIV test result (women and men); multiple sexual partners; inequality between women and men; women’s acceptance of their husbands abuse; financial withdrawal; extramarital sex; no decision making power |
| 5.Providers’s recommendations for improvements | Legal, community and religious interventions  Male involvement in the programs of violence prevention  Collaboration with other stakeholders  Compassionate care  Inclusion of IPV specific policy frameworks in the national legislation | Establishing a separate registration book for IPV; empowerment of women; routine assessment of IPV; education of women and men; minimizing the economic gap of women; counseling on IPV; decentralizing the program; involving other partners/collaboration need; training of staff; commitment of the healthcare workers; internalizing the IPV problem; men should assist in routine home activities; HCP guide women to legal services; HCP guide women to elders and church services; awareness creation; mainstreaming GBV in schools and other institutions; referral system should be available; discussion with others; establishing particular unit for IPV; advise of agreements; community-based intervention; follow-up care; focal person needed for IPV; respect and humanity; clubs needed on reproductive health; home-to-home visits via Health Extension Workers (HEWs); capacity building of staff |

**NB:** HCWs = Healthcare workers; GBV = Gender-based violence

Supporting file_Section 3: COREQ guidelines


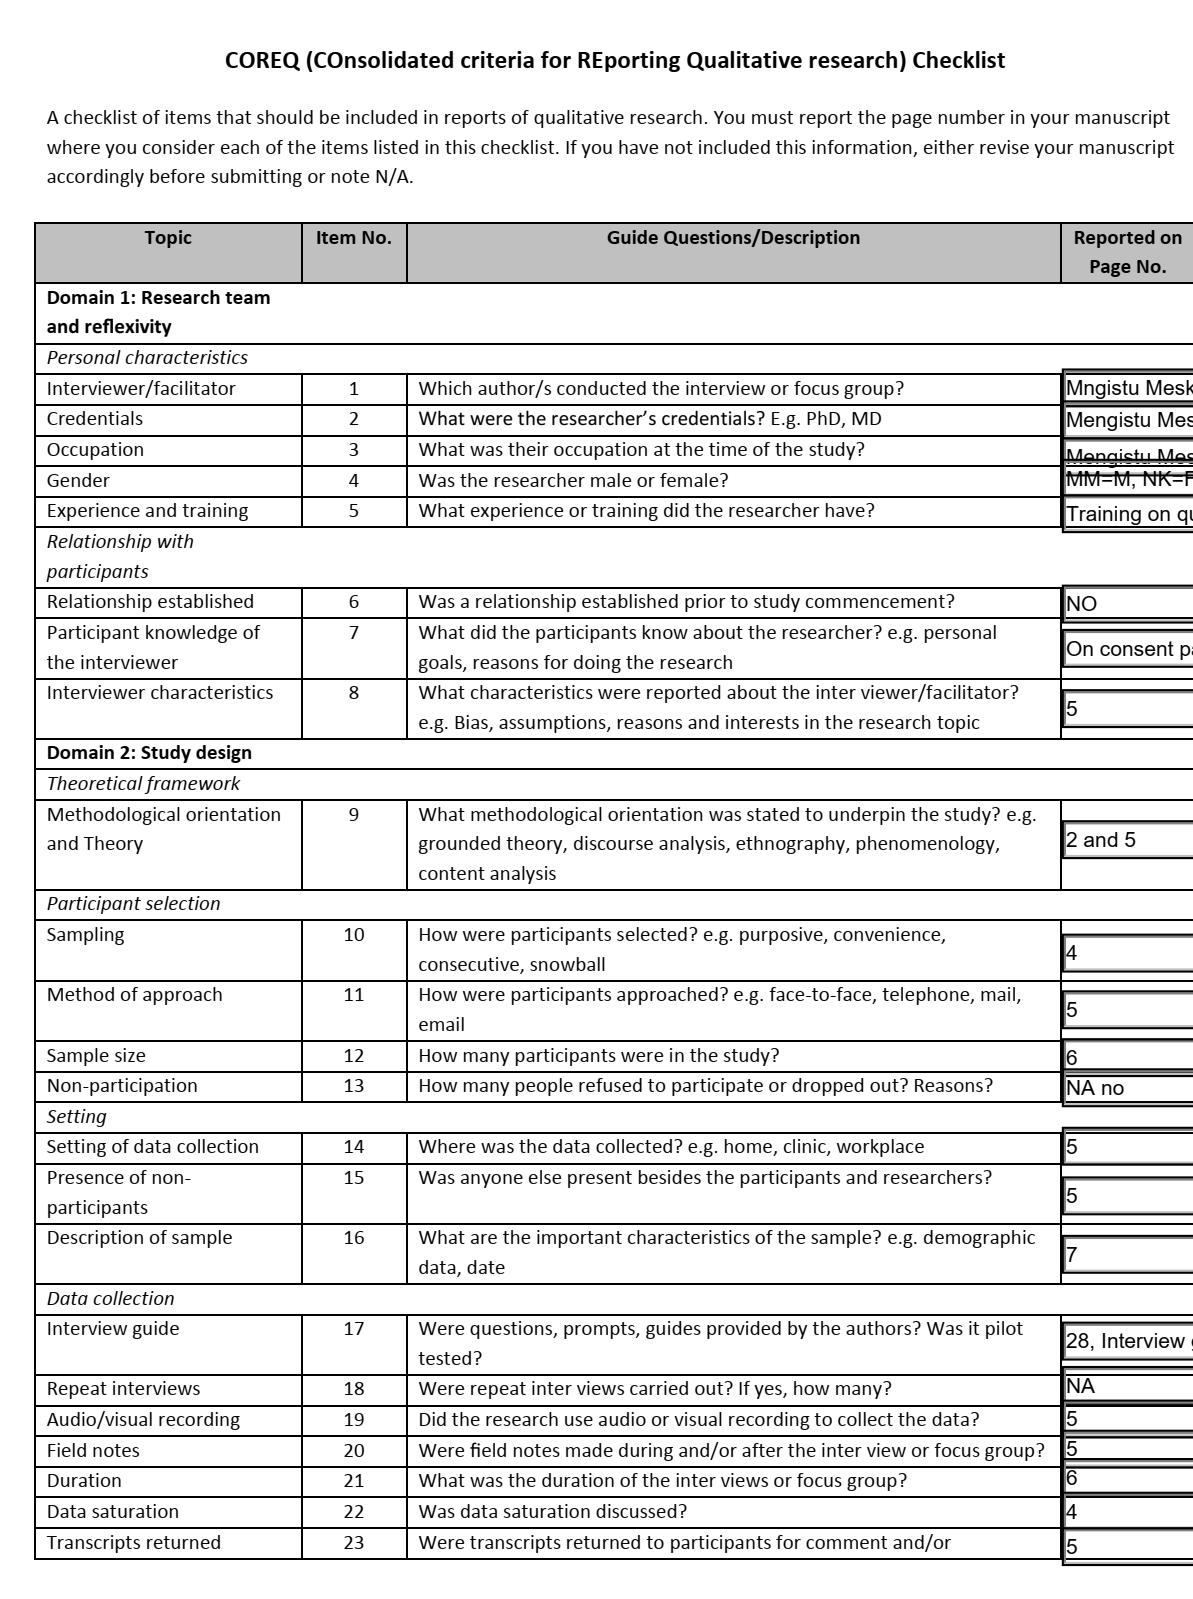


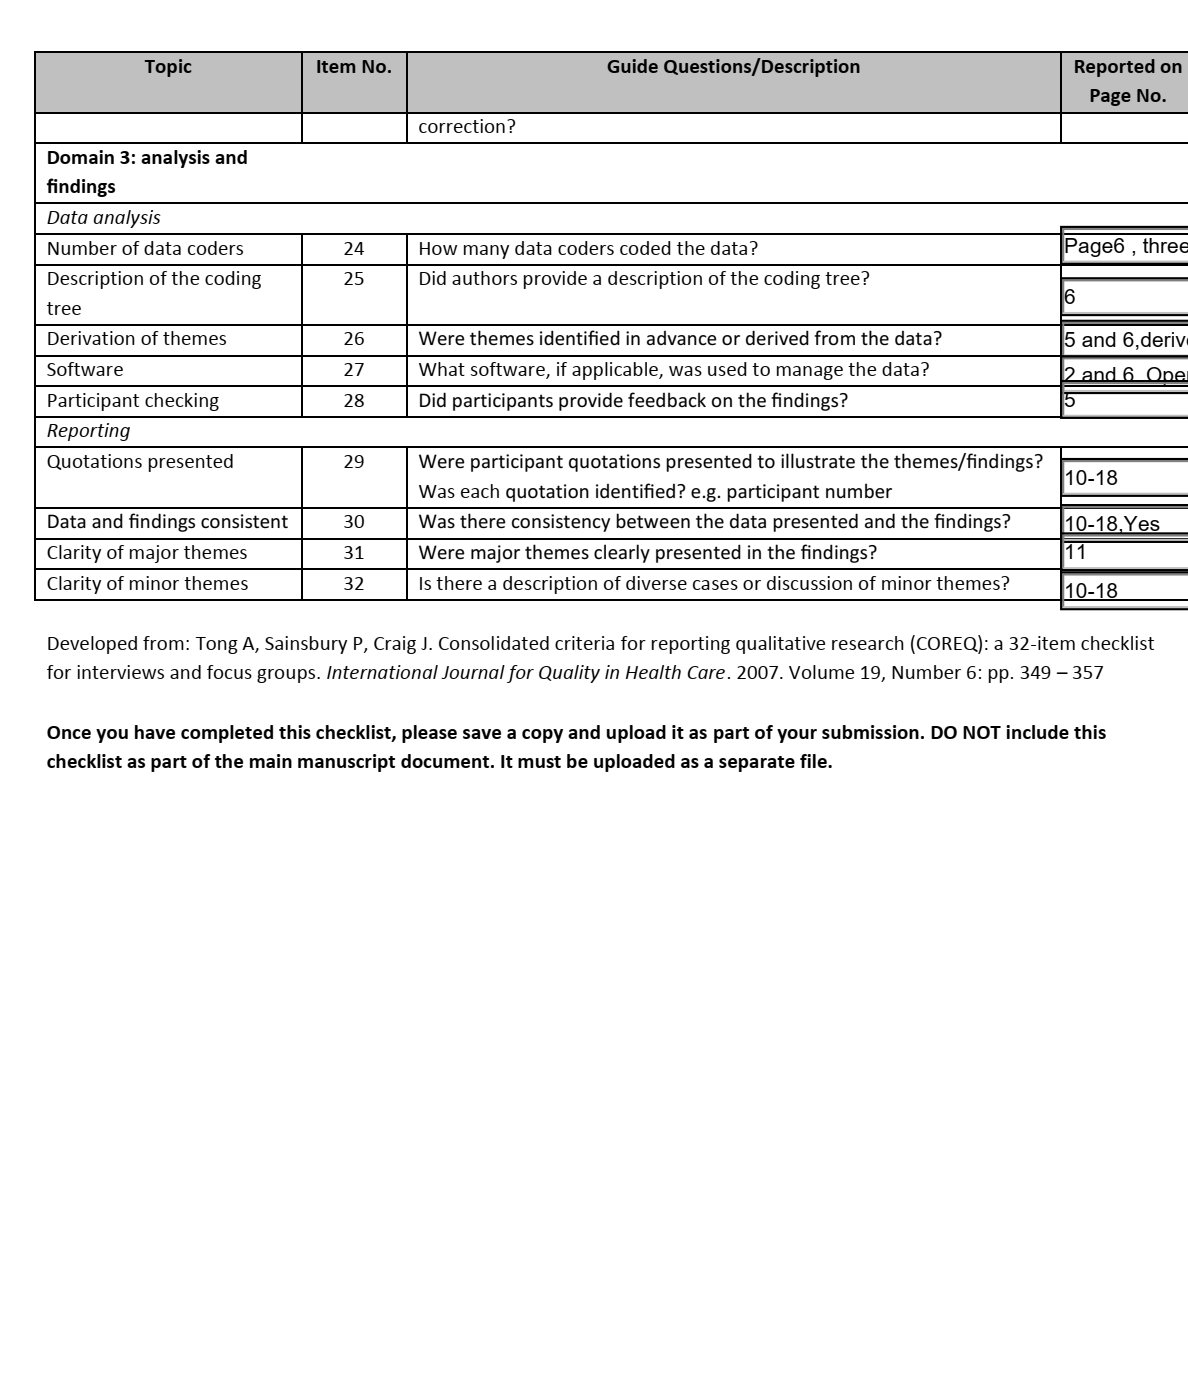

Supplement: Supplementary file 1 [file get_supplementary_file.php]
